# Supplementary material for: Authentication and Quantitation of Fraud in Extra Virgin Olive Oils Based on HPLC-UV Fingerprinting and Multivariate Calibration
Source: PubMed Central journal article supplement (PMC5920409; doi:10.3390/foods7040044), 2018-03-21
Supplement: foods-07-00044-s001.pdf [file foods-07-00044-s001.pdf]

**Supplementary Material:**

**Table S1.** PLS calibration and prediction errors in the identification and quantitation of adulterants (Picual EVOO, ROO and sunflower oil) in an Arbequina EVOO when using raw HPLC-UV chromatographic fingerprints from 3 to 26 min as sample descriptors.

| Acquisition wavelength | Calibration errors (%) |      |               | Prediction errors (%) |      |               |
|------------------------|------------------------|------|---------------|-----------------------|------|---------------|
|                        | Adulterant             |      |               | Adulterant            |      |               |
|                        | Picual EVOO            | ROO  | Sunflower oil | Picual EVOO           | ROO  | Sunflower oil |
| 257 nm                 | 0.12                   | 0.47 | 0.23          | 0.10                  | 0.26 | 0.55          |
| 280 nm                 | 0.37                   | 0.25 | 0.30          | 0.15                  | 0.30 | 0.57          |
| 316 nm                 | 2.88                   | 1.54 | 0.63          | 0.19                  | 1.24 | 0.62          |

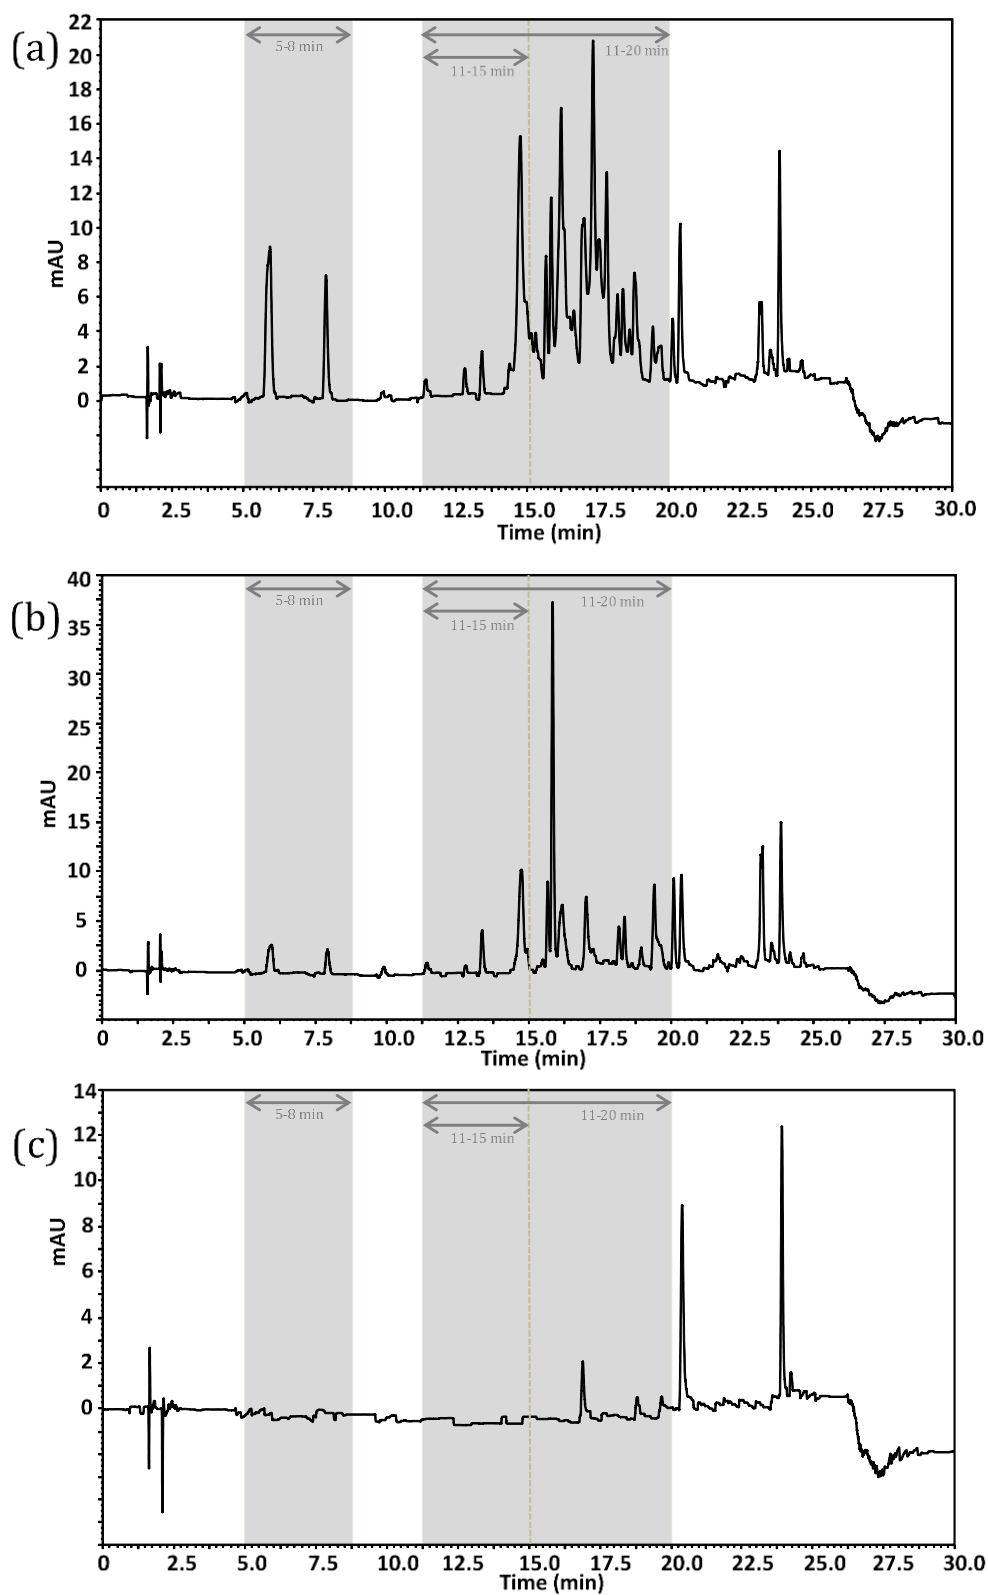

**Figure S1.** HPLC-UV chromatographic fingerprints registered at 280 nm of olive oils (a, b) and sunflower oil (c).

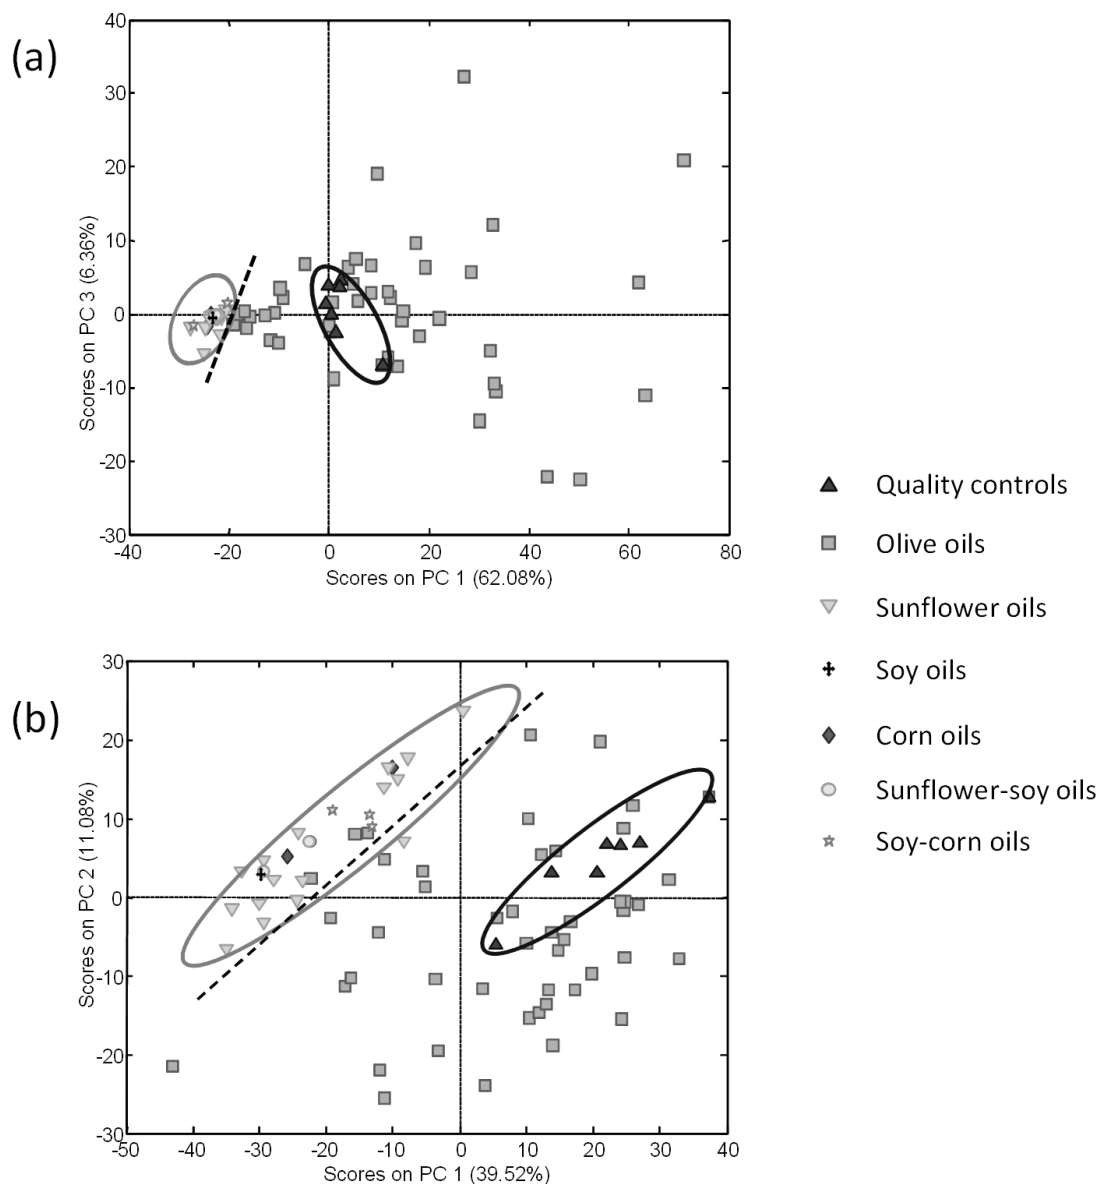

**Figure S2.** (a) PCA results (scores plot of PC1 vs PC3) employing as analytical data the HPLC-UV chromatographic fingerprints obtained for time segment 14-20 min at 280 nm. (b) PCA results (scores plot of PC1 vs PC2) employing as analytical data the HPLC-UV chromatographic fingerprints obtained combining time segments 5-8 min and 11-20 min at 280 nm.

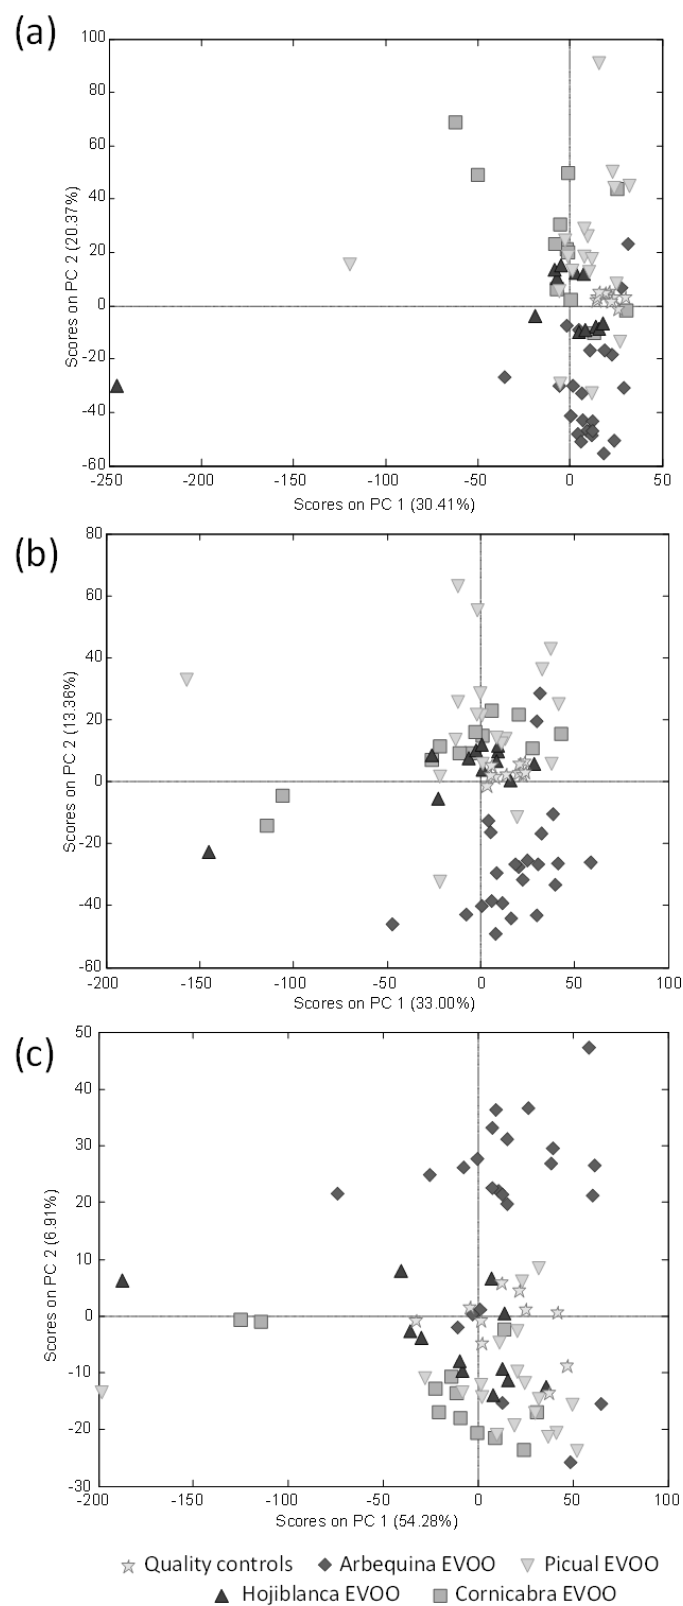

**Figure S3.** PCA results (score plots of PC1 vs PC2) for the analysis of 66 EVOOs when using raw HPLC-UV chromatographic fingerprint registered at (a) 257 nm, (b) 280 nm, and (c) 316 nm as sample descriptors.
